# Supplementary material for: Biodegradable MoNx@Mo-foil electrodes for human-friendly supercapacitors
Source: Royal Society of Chemistry journal article supplement (doi:10.1039/d4tb00649f), 2024-01-01
Supplement: d4tb00649f1.pdf [file d4tb00649f1.pdf]

## **Supporting Information**

### Biodegradable MoN<sub>x</sub>@Mo-foil electrodes for human-friendly supercapacitors

Hongjia Ren<sup>1a</sup>, Hongru Zhao<sup>1a</sup>, Muhammad Sufyan Javed<sup>a,\*</sup>, Sajid Hussain Siyal<sup>b</sup>, Xinze Zhang<sup>a</sup>,

Xiaofeng Zhang<sup>a</sup>, Awais Ahmad<sup>c,d</sup>, Iftikhar Hussain<sup>e</sup>, Mohamed A. Habila<sup>f</sup>, Weihua Han<sup>a,\*</sup>

<sup>a</sup>*School of Physical Science and Technology, Lanzhou University, Lanzhou 730000, China*

<sup>b</sup>*Department of Metallurgy and Materials Engineering, Dawood University of Engineering and  
Technology Karachi 74800, Sindh Pakistan*

<sup>c</sup>*Departamento de Química Organica, Universidad de Cordoba, Edificio Marie Curie (C-3), Ctra  
Nnal IV-A, Km 396, E14014 Cordoba, Spain*

<sup>d</sup>*Department of Chemistry, The University of Lahore, Lahore, 54590, Pakistan*

<sup>e</sup>*Department of Mechanical Engineering, City University of Hong Kong, 83 Tat Chee Avenue, Hong  
Kong*

<sup>f</sup>*Department of Chemistry, College of Science, King Saud University, P. O. Box 2455, Riyadh 11451,  
Saudi Arabia*

\*E-mail addresses: [safisabri@gmail.com](mailto:safisabri@gmail.com) (Dr. Javed), [hanwh@lzu.edu.cn](mailto:hanwh@lzu.edu.cn) (Prof. Han)

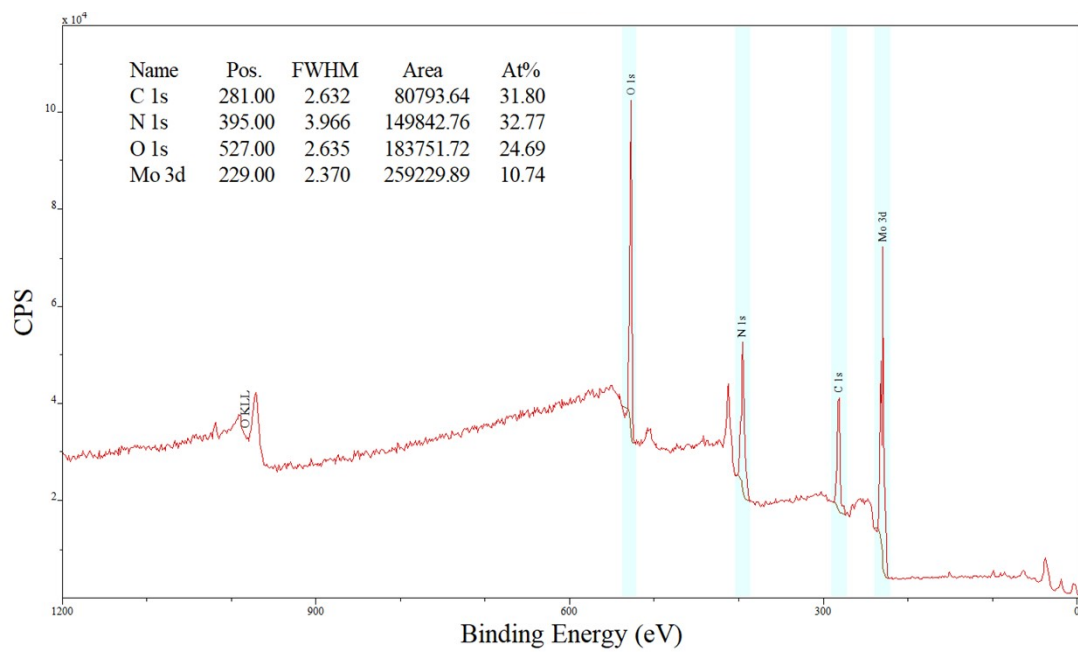

**Fig. S1:** XPS elemental content analysis of MoN<sub>x</sub>@Mo-foil

### Surface Area

Single point surface area at  $P/P_0 = 0.300393767$ : 1.6840 m<sup>2</sup>/g

BET Surface Area: 2.3087 m<sup>2</sup>/g

Langmuir Surface Area: 5.9090 m<sup>2</sup>/g

t-Plot External Surface Area: 3.9802 m<sup>2</sup>/g

BJH Adsorption cumulative surface area of pores  
between 17.000 Å and 3000.000 Å diameter: 0.875 m<sup>2</sup>/g

BJH Desorption cumulative surface area of pores  
between 17.000 Å and 3000.000 Å diameter: 1.7456 m<sup>2</sup>/g

### Pore Volume

Single point adsorption total pore volume of pores  
less than 7823.425 Å diameter at  $P/P_0 = 0.997538599$ : 0.001789 cm<sup>3</sup>/g

t-Plot micropore volume: -0.001050 cm<sup>3</sup>/g

BJH Adsorption cumulative volume of pores  
between 17.000 Å and 3000.000 Å diameter: 0.001161 cm<sup>3</sup>/g

BJH Desorption cumulative volume of pores  
between 17.000 Å and 3000.000 Å diameter: 0.001676 cm<sup>3</sup>/g

### Pore Size

Adsorption average pore width (4V/A by BET): 31.0021 Å

BJH Adsorption average pore diameter (4V/A): 53.076 Å

BJH Desorption average pore diameter (4V/A): 38.397 Å

### Horvath-Kawazoe

Maximum pore volume at  $P/P_0 = 0.013455822$ : 0.000116 cm<sup>3</sup>/g

Median pore width: 16.552 Å

**Fig. S2:** Molybdenum foil specific surface area and pore size test report

## Summary Report

### Surface Area

Single point surface area at  $P/P_0 = 0.323509743$ : 2.4079 m<sup>2</sup>/g

BET Surface Area: 2.3869 m<sup>2</sup>/g

Langmuir Surface Area: 4.4338 m<sup>2</sup>/g

t-Plot Micropore Area: 7.5818 m<sup>2</sup>/g

t-Plot External Surface Area: -5.1949 m<sup>2</sup>/g

### Pore Volume

Single point adsorption total pore volume of pores  
less than 0.000 Å diameter at  $P/P_0 = 0.999821745$ : 0.197411 cm<sup>3</sup>/g

t-Plot micropore volume: 0.004114 cm<sup>3</sup>/g

### Pore Size

Adsorption average pore width (4V/A by BET): 3308.2566 Å

### Horvath-Kawazoe

Maximum pore volume at  $P/P_0 = 0.010567618$ : 0.000820 cm<sup>3</sup>/g

Median pore width: 11.558 Å

**Fig. S3:** MoN<sub>x</sub>@Mo-foil specific surface area and pore size test report
